# Supplementary material
Source: HighWire-hosted journal article supplement (https://www.annfammed.org/highwire/filestream/700/field_highwire_adjunct_files/0/Patil_Supp_Apps_USE.pdf)
Supplement: Patil_Supp_Apps_USE.pdf [file Patil_Supp_Apps_USE.pdf]

## **Supplemental materials for:**

Patil S, Wareg NK, Hodges KL, Smith JB, Kaiser MS, LeFevre ML. Home blood pressure monitoring in cases of clinical uncertainty to differentiate appropriate inaction from therapeutic inertia. *Ann Fam Med.* 2020;18(1):50-58.

Supplemental Figure 1: Intervention flow diagram

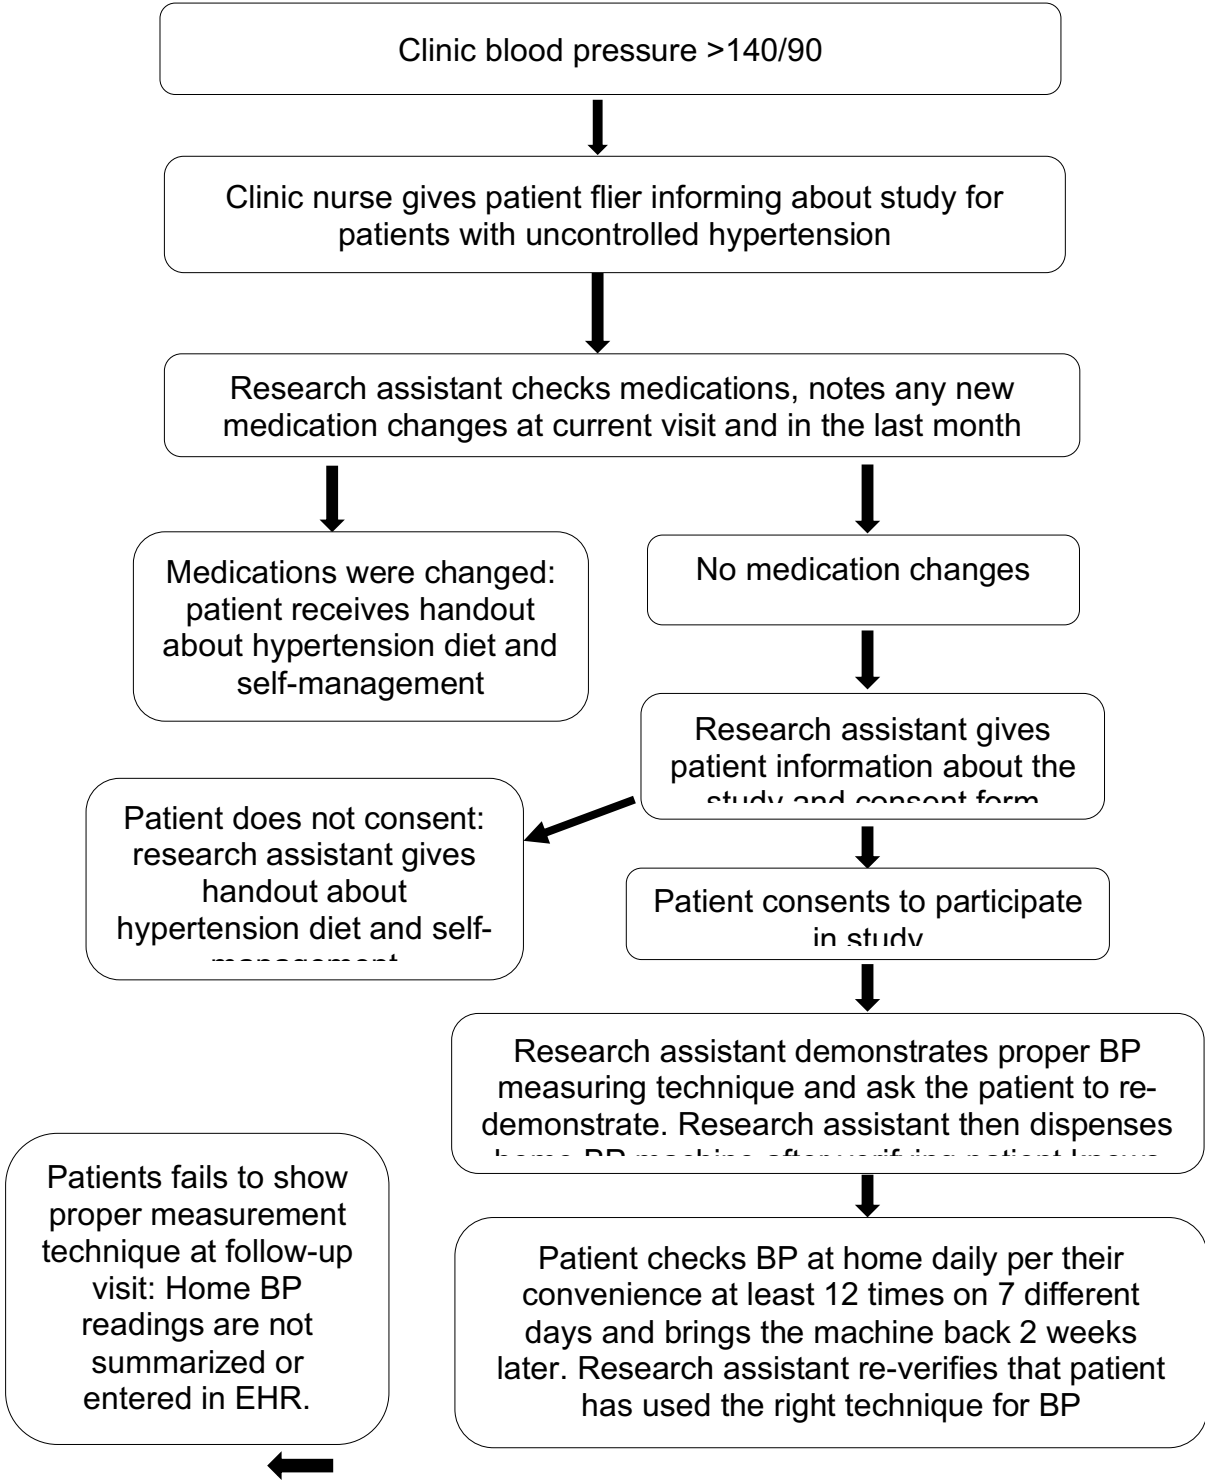

*Supplemental Appendix: Task checklist for intervention fidelity*

Supplemental Appendix: Task checklist adapted from [Centers for Disease Control and Prevention: Self-Measured Blood Pressure Monitoring: Actions Steps for Clinicians. Atlanta, GA: Centers for Disease Control and Prevention, US Dept of Health and Human Services; 2014.](#)  
[https://millionhearts.hhs.gov/files/MH\\_SMBP\\_Clinicians.pdf](https://millionhearts.hhs.gov/files/MH_SMBP_Clinicians.pdf) (page 20, Table 8)

The patient should perform all tasks at the initial visit and 75% of the tasks when returning home BP machine with proper cuff placement and arm support considered an absolute requirement to consider the home BP readings valid.

1. Sit quietly for a few minutes before checking BP (1point)
2. Place the cuff on a **bare arm**. (1point)
3. Use the **proper size cuff**; if two cuff sizes fit, use the larger one. (1point)
4. Place the cuff **½ to 1 inch above the antecubital space** with the cuff's bladder (ART indicator) directly over the brachial artery on the upper arm. (Required task: 2points)
5. Apply the cuff carefully, allowing room for no more or no less than **two fingers** underneath. (1point)
6. Make sure the patient's **back is supported and relaxed**. (1point)
7. Make sure the patient's **feet are supported and legs uncrossed**. (1point)
8. Keep the **upper arm supported, relaxed, and at heart level**. (Required task: 2points)
9. Ask the patient the keep the **arm still and not talk** during the measurement cycle. (2points)

Supplemental Table 1: Patients with uncontrolled home BP and no documented change in BP management

| Patient | Age | <i>Clinic BP</i> |           | <i>Average Home BP</i> |           | Notes                                                                     |
|---------|-----|------------------|-----------|------------------------|-----------|---------------------------------------------------------------------------|
|         |     | Systolic         | Diastolic | Systolic               | Diastolic |                                                                           |
| 1       | 62  | 147              | 88        | 141                    | 81        | borderline systolic BP                                                    |
| 2       | 70  | 176              | 90        | 152                    | 86        | perceived acceptable for 70 years old                                     |
| 3       | 69  | 165              | 81        | 140                    | 86        | borderline systolic BP                                                    |
| 4       | 63  | 164              | 96        | 140                    | 81        | borderline systolic BP                                                    |
| 5       | 34  | 138              | 102       | 120                    | 92        | borderline diastolic BP                                                   |
| 6       | 58  | 178              | 98        | 145                    | 83        | perceived good control for individual patient per PCP                     |
| 7       | 73  | 142              | 82        | 150                    | 70        | perceived acceptable for 73 years old                                     |
| 8       | 47  | 160              | 88        | 130                    | 91        | borderline diastolic BP                                                   |
| 9       | 48  | 160              | 114       | 137                    | 90        | borderline diastolic BP                                                   |
| 10      | 61  | 144              | 92        | 137                    | 95        | systolic improved and diastolic worsened, review BP control at next visit |
| 11      | 63  | 150              | 89        | 141                    | 89        | borderline systolic BP                                                    |
| 12      | 35  | 149              | 94        | 148                    | 94        | had gastroenteritis during one of the two weeks when checking home BP     |

Supplemental Figure 2. Home blood pressure EHR entry

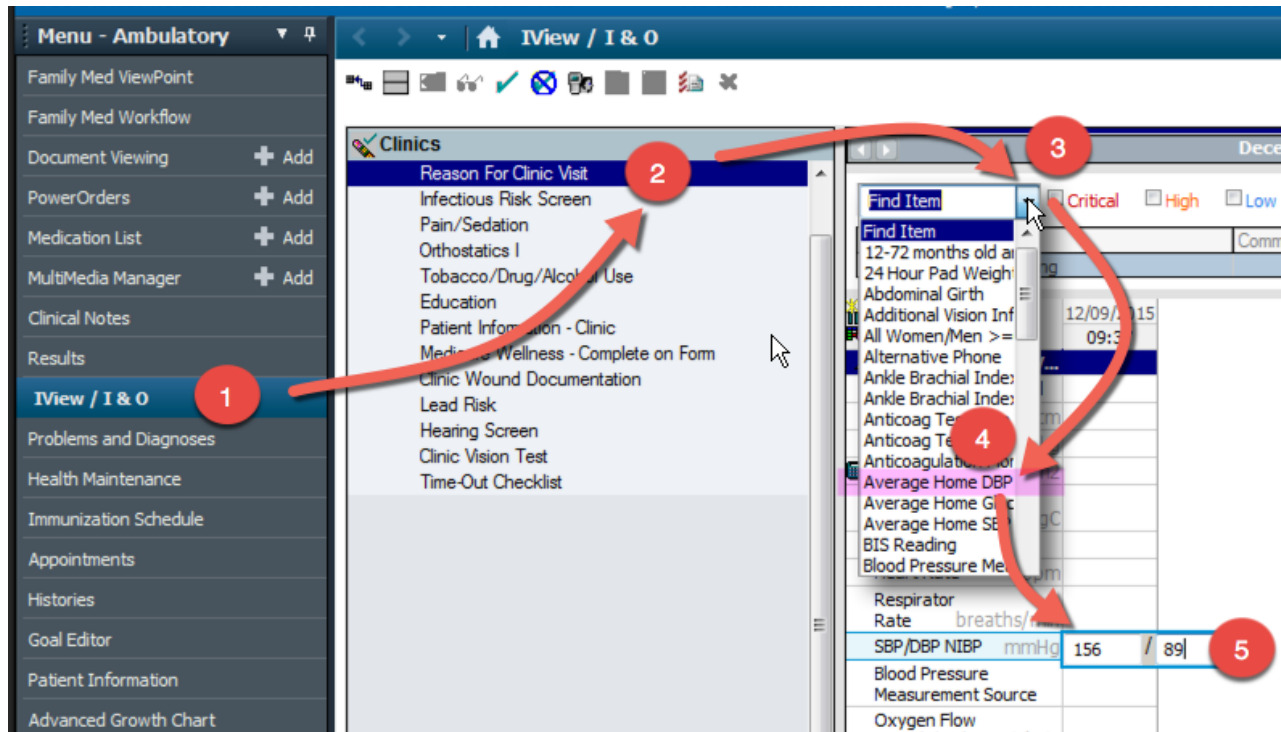

---

**Supplemental Table 2. Postintervention Survey Main Results**

---

|                                                                               |                                                                                                             |
|-------------------------------------------------------------------------------|-------------------------------------------------------------------------------------------------------------|
| Among patients who plan to continue home BP monitoring after the study        |                                                                                                             |
| Own home BP monitor, %                                                        | 88                                                                                                          |
| Do not own home BP monitor, %                                                 | 51                                                                                                          |
| Patients' views on owning home BP monitor, %                                  |                                                                                                             |
| If insurance covers home BP monitor                                           | 83 would buy one<br>11 would buy if BP is uncontrolled<br>49 can afford paying \$20-\$40 for a monitor      |
| If insurance does not cover home BP monitor, %                                | 43 would buy if price is affordable<br>29 can afford paying \$40-\$60 for a monitor<br>23 cannot afford one |
| Preferred frequency of home BP monitoring, %                                  |                                                                                                             |
| Twice a day                                                                   | 20                                                                                                          |
| Three times a week                                                            | 18                                                                                                          |
| Once a week                                                                   | 17                                                                                                          |
| Once a day                                                                    | 15                                                                                                          |
| Preferred way of discussing shared home BP readings with physician, %         |                                                                                                             |
| No preference                                                                 | 29                                                                                                          |
| Individual readings                                                           | 1                                                                                                           |
| Graph of average readings per week                                            | 7                                                                                                           |
| Graph of all individual readings                                              | 7                                                                                                           |
| Steps reported most difficult to remember/follow when measuring BP at home, % |                                                                                                             |
| Wait at least 30 minutes after drinking coffee or exercising                  | 39                                                                                                          |
| No talking while measuring                                                    | 33                                                                                                          |
| Sit in a chair with back supported                                            | 17                                                                                                          |

---

BP = blood pressure.

**Here is why you need to follow the instructions:**

| Blood Pressure Variability     |                                                                                   |
|--------------------------------|-----------------------------------------------------------------------------------|
| Factor                         | Systolic - Top Number                                                             |
| Cuff Too Small                 | 10-40 ↑                                                                           |
| Cuff Over Clothing             | 10-40 ↑ or ↓                                                                      |
| Back/Feet Unsupported          | 5-15 ↑                                                                            |
| Legs Crossed                   | 5-8 ↑                                                                             |
| Arm Tense                      | 15 ↑                                                                              |
| Not Resting 3-5 Minutes        | 10-20 ↑                                                                           |
| Anxiety/White Coat             | As much as 30 ↑                                                                   |
| Patient Talking                | 10-15 ↑                                                                           |
| Labored Breathing              | 5-8 ↑                                                                             |
| Full Bladder                   | 10-15 ↑                                                                           |
| Pain                           | 10-30 ↑                                                                           |
| Arm Above or Below Heart Level | 10 ↑ or ↓ For every 1 cm above or below heart level, blood pressure varies by 0.8 |
| Factor                         | Diastolic - Bottom Number                                                         |
| Arm Extended and Unsupported   | 10% ↑                                                                             |

[Centers for Disease Control and Prevention. Self-Measured Blood Pressure Monitoring: Actions Steps for Clinicians. Atlanta, GA: Centers for Disease Control and Prevention, US Dept of Health and Human Services; 2014.](#)

| Recommended Blood Pressure Goals                   |                  |
|----------------------------------------------------|------------------|
| Age > 60 years                                     | Less than 150/90 |
| Age < 60 years                                     | Less than 140/90 |
| Any age if with Diabetes or Chronic Kidney Disease | Less than 140/90 |

**Remember: You can always call and schedule a nurse visit in your clinic to measure your blood pressure.**

## HOME BLOOD PRESSURE MEASUREMENT INSTRUCTIONS

Make sure to wait 30 minutes after exercising, eating, or smoking before taking your blood pressure.

Rest in a chair for at least 5 minutes with your arm resting comfortably at heart level. Sit calmly and do not talk.

Place the bottom of the cuff above the bend of the elbow on a bare skin. Make sure the cuff cord runs in front of your elbow.

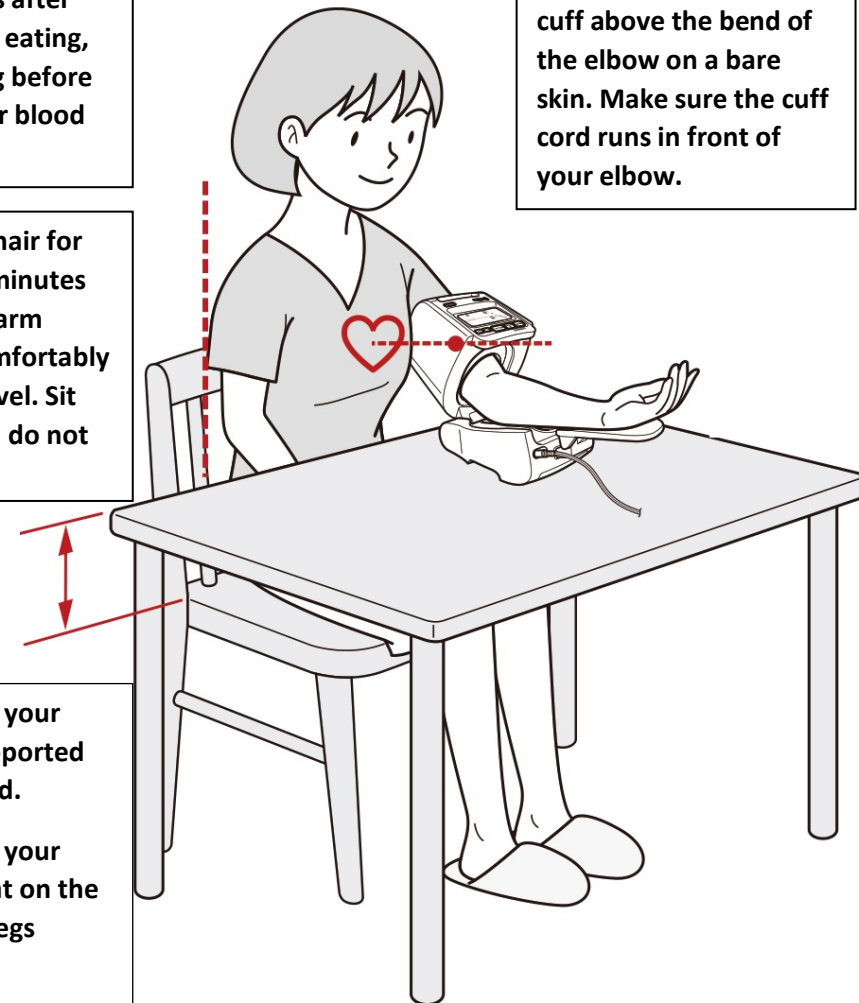

Make sure your back is supported and relaxed.

Make sure your feet are flat on the floor and legs uncrossed.

Image: [OMRON Healthcare Group. Upper Arm Blood Pressure Monitor \(Fully Automatic Type\). OMRON Healthcare 2018.](#)

## Get Started Now and Begin Recording Your Blood Pressures

| Date | BP | Date | BP | Date | BP |
|------|----|------|----|------|----|
|      |    |      |    |      |    |
|      |    |      |    |      |    |
|      |    |      |    |      |    |
|      |    |      |    |      |    |
|      |    |      |    |      |    |

Lower your blood pressure without medication with these lifestyle modifications:

### LIFESTYLE MODIFICATION RECOMMENDATIONS

| MODIFICATION                                                                                                                                                                                                                                                                                                                                     | RECOMMENDATION                                                                                             | Average BP Reduction Range ↑ |
|--------------------------------------------------------------------------------------------------------------------------------------------------------------------------------------------------------------------------------------------------------------------------------------------------------------------------------------------------|------------------------------------------------------------------------------------------------------------|------------------------------|
| Weight Reduction                                                                                                                                                                                                                                                                                                                                 | Maintain Normal Body Weight (Body Mass Index 18.5-24.9 kg/m <sup>2</sup> )                                 | 5-20 mmHg**/10 Kg            |
| DASH Diet (Dietary Approaches to Stop Hypertension)                                                                                                                                                                                                                                                                                              | Diet rich in fruits, vegetables, and low-fat dairy products with reduced saturated and total fat content   | 8-14 mmHg                    |
| Dietary Sodium Reduction                                                                                                                                                                                                                                                                                                                         | Reduce dietary sodium intake to ≤100 mmol per day (2.4 g sodium or 6 g sodium chloride)                    | 2-8 mmHg                     |
| Aerobic Physical Activity                                                                                                                                                                                                                                                                                                                        | Regular aerobic physical activity (e.g., brisk walking) at least 30 minutes per day, most days of the week | 4-9 mmHg                     |
| Moderation of Alcohol Consumption                                                                                                                                                                                                                                                                                                                | Men: Limit to ≤2 drinks* per day<br>Women & Lighter Weight Persons: Limit to ≤1 drink per day              | 2-4 mmHg                     |
| * 1 drink = ½ OZ a 15ml ethanol (e.g., 12 OZ beer, 5 OZ wine, 1.5 OZ 80-proof whiskey)                                                                                                                                                                                                                                                           |                                                                                                            |                              |
| ** mmHg = A millimetre of mercury is a manometric unit of pressure                                                                                                                                                                                                                                                                               |                                                                                                            |                              |
| ↑ Effects are dose and time dependent                                                                                                                                                                                                                                                                                                            |                                                                                                            |                              |
| <a href="#">National Institutes of Health. Reference Card From the Seventh Report of the Joint National Committee on Prevention, Detection, Evaluation, and Treatment of High Blood Pressure (JNC 7). Bethesda, MD: U.S. Dept. of Health and Human Services, National Institutes of Health, National Heart, Lung, and Blood Institute; 2003.</a> |                                                                                                            |                              |

To learn how to measure BP at home, check this Self-measured Blood Pressure (SMBP) training video created by the American Medical Association and the American Heart Association:

<https://www.youtube.com/watch?v=9O4EX1CuC5E> or

<http://newsroom.heart.org/file?fid=5c76d7e32cfac2582a7b62e8>

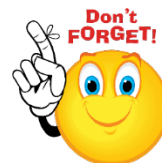

Your arm circumference measures the size around your upper arm and is important when purchasing the right size blood pressure cuff.

| Cuff Description    | Arm Circumference Range  |
|---------------------|--------------------------|
| Small Adult Cuff    | Between 7 to 9 inches.   |
| Standard Adult Cuff | Between 9 to 13 inches.  |
| Large Adult Cuff    | Between 13 to 17 inches. |

### Validated Blood Pressure Monitors (Prices may vary.)

**Omron BP760N 7 Series Upper Arm Blood Pressure Monitor (displays the average)**

- Walmart – \$64.88
- D&H Drugstore – \$89.99
- University Pharmacy – \$47.66
- Walgreens – \$79.99
- Amazon – \$49.75

**Omron 10 Series Upper Arm Smart Blood Pressure Monitor, BP786 (displays the average)**

- Walmart - \$60.99
- Amazon - \$62.58
- University Pharmacy – \$53.39
- Walgreens – 104.99

**A&D BP Monitor - arm 8.6-16.5 u767**

- Kilgore's Pharmacy – \$52.80
- Amazon – \$59.99

**A&D AccuFit Plus (UA-767F)**

- D&H Drugstore - \$52.80

**Omron 3 Series** University Pharmacy - \$29.99

**Omron 5 Series (displays the average)** University Pharmacy – \$34.3
